# Supplementary material for: 2021 consensus statement for preventing and managing low back pain in elite and subelite adult rowers
Source: HighWire-hosted journal article supplement (doi:10.1136/bjsports-2020-103385), 2021-03-08
Supplement: bjsports-2020-103385supp003_data_supplement.pdf [file bjsports-2020-103385supp003_data_supplement.pdf]

|                     |                                                                                                                                                                                                                                                                                                                                                                                                                                                        |                                                                                                                                                                                                                                                                                                                                                                                                                                                                                                            |                                                                                                                                                                                                                                                                                                                                                                                                                                                                                                                                                                                                                                                                                                                                                                                                                                                                                                                                                     |                                                                                                                                                                                                                                                                                                                                                                                                                                                                                                                                                                                                                                                                                                                                                                                                                                                                                                                                |
|---------------------|--------------------------------------------------------------------------------------------------------------------------------------------------------------------------------------------------------------------------------------------------------------------------------------------------------------------------------------------------------------------------------------------------------------------------------------------------------|------------------------------------------------------------------------------------------------------------------------------------------------------------------------------------------------------------------------------------------------------------------------------------------------------------------------------------------------------------------------------------------------------------------------------------------------------------------------------------------------------------|-----------------------------------------------------------------------------------------------------------------------------------------------------------------------------------------------------------------------------------------------------------------------------------------------------------------------------------------------------------------------------------------------------------------------------------------------------------------------------------------------------------------------------------------------------------------------------------------------------------------------------------------------------------------------------------------------------------------------------------------------------------------------------------------------------------------------------------------------------------------------------------------------------------------------------------------------------|--------------------------------------------------------------------------------------------------------------------------------------------------------------------------------------------------------------------------------------------------------------------------------------------------------------------------------------------------------------------------------------------------------------------------------------------------------------------------------------------------------------------------------------------------------------------------------------------------------------------------------------------------------------------------------------------------------------------------------------------------------------------------------------------------------------------------------------------------------------------------------------------------------------------------------|
|                     | Coaches & medical staff should encourage rowers to seek assessment of Low Back Pain (LBP) early. Delaying this can prolong recovery.                                                                                                                                                                                                                                                                                                                   | Assessment & management by a Medical Doctor & Physiotherapist experienced in managing rowing-related LBP is ideal.                                                                                                                                                                                                                                                                                                                                                                                         | Episodes of rowing-related LBP are most often not serious, they are self-limiting & early management will educate the rower about severity & recovery.                                                                                                                                                                                                                                                                                                                                                                                                                                                                                                                                                                                                                                                                                                                                                                                              | Many factors contribute to a presentation of rowing-related LBP, these include; physical, biological, social & psychological –they all need to be managed.                                                                                                                                                                                                                                                                                                                                                                                                                                                                                                                                                                                                                                                                                                                                                                     |
|                     | INITIAL TRIAGE – first presentation                                                                                                                                                                                                                                                                                                                                                                                                                    | ACUTE- first week                                                                                                                                                                                                                                                                                                                                                                                                                                                                                          | SUB-ACUTE – return to rowing                                                                                                                                                                                                                                                                                                                                                                                                                                                                                                                                                                                                                                                                                                                                                                                                                                                                                                                        | REHABILITATION – return to full training                                                                                                                                                                                                                                                                                                                                                                                                                                                                                                                                                                                                                                                                                                                                                                                                                                                                                       |
| EXAMINATION         | <p>Establish type of presentation;</p> <p>Non-specific LBP with / without somatic referral</p> <p>Radicular pain with / without radiculopathy</p> <p>Inflammatory component to pain</p> <p>Atypical pain requiring red flag exclusion</p> <p>Psycho-social screening for; mental health issues, catastrophizing, anxiety, upcoming competition &amp; / or life stressors.</p>                                                                          | <p>Re-assess findings from initial triage including; sitting tolerance, lumbar range of motion &amp; ability to complete activities of daily living (ADL).</p> <p>Assess rowing specific ranges; specifically hip flexion &amp; hamstring length, as they affect how the pelvis &amp; lumbar spine move in the boat. Improvement in the motion of the pelvis &amp; hips is desirable.</p>                                                                                                                  | <p>Assess rower's ability to move through rowing specific movement &amp; ability to tolerate spinal load.</p> <p>If have not yet rowed, trial erg row &amp;/or short duration on-water row with assessment before &amp; after.</p> <p>Response to on-water training should be continually assessed.</p> <p>Coach or medical staff should ensure rower's stroke pattern consists of appropriate pelvic motion &amp; limits excessive low back motion.</p>                                                                                                                                                                                                                                                                                                                                                                                                                                                                                            | <p>Ensure the rower is confident in their ability to progress.</p> <p>Objective markers in initial triage assessed for signs of resolution; pain should be absent during ADL &amp; cross training.</p> <p>Rowers should be able to row with usual power &amp; tolerate changes in; water conditions, rowing rate &amp; seating in boat.</p> <p>Rowing stroke pattern should be monitored during water or erg sessions that induce high levels of fatigue.</p>                                                                                                                                                                                                                                                                                                                                                                                                                                                                  |
| MANAGEMENT          | <p>Restore function in ADL with early &amp; effective pain relief. Manual therapies may assist. Avoid aggravating activities.</p> <p>Red flags include changes in; sensation or motor control, bladder or bowel function OR systemic signs of illness such as weight loss, night pain &amp; sweats. Referral to medical specialist required.</p> <p>Refer to Psychologists if there is a regular person the rower sees / specific need identified.</p> | <p>Control of pain with activity modification +/- medication (prescribed under International Olympic Committee &amp; World Anti-Doping Agency guidelines) +/- manual therapies.</p> <p>Restore movement via rowing specific exercises &amp; progress towards spinal load requirements.</p> <p>Poor sleep, performance pressure, fear avoidance behaviour &amp; life stressors signal consideration for support on an individual basis.</p>                                                                 | <p>Rowers should be active participants in their recovery.</p> <p>It is important for the rower to avoid developing a fear of specific movement patterns, a cognitive functional therapy approach or a confidence with movement approach can be helpful. Splinting or overprotective movements should be discouraged.</p> <p>If a rower is finding it difficult to cope or if they have already accessed psychological services, this should be encouraged &amp; continued.</p>                                                                                                                                                                                                                                                                                                                                                                                                                                                                     | <p>Emphasis placed on restoring usual rowing biomechanics &amp; addressing modifiable risk factors that can prevent reoccurrence.</p> <p>Continue to support self-management, the rower should be seen less for specific interventions such as manual therapies or ongoing use of medication.</p> <p>Do not progress to this stage if red flags identified.</p> <p>Yellow flags include recurrent history of failing to progress or symptoms in excess of presentation; progress slowly &amp; with care.</p>                                                                                                                                                                                                                                                                                                                                                                                                                   |
| EXERCISE & TRAINING | <p>Avoid complete rest.</p> <p>If rowing aggravates; stop on-water &amp; rowing ergometer (erg) training.</p> <p>If can sit without pain; start short duration stationary bike. If sitting is painful prescribe walking; duration &amp; including hills or steps is dependent on symptoms.</p> <p>If rower is able to row on-water or erg without pain or muscles guarding, they should be encouraged to do so.</p>                                    | <p>Focus on what the rower CAN DO to maintain fitness but not exacerbate LBP.</p> <p>Continuation or graduation of a cardiovascular cross-training program within limits of the pain.</p> <p>If the rower tolerates sitting, stationary bike used. As sitting tolerance increases, a trial erg row can commence &amp; then progression to a short duration on-water row of less than 10km.</p> <p>If sitting is not tolerated, use of an elliptical trainer, swimming or walking should be encouraged.</p> | <p>If not able to row; continue cross-training with increasing duration &amp; intensity. Can use; stationary bike, elliptical trainer, ski erg &amp; walking including up hills &amp; stairs. Consider swimming but gradually increase to avoid shoulder pain. Modality is dependent on symptoms &amp; access.</p> <p>Return to rowing program should be agreed on by medical staff, rower &amp; coach. Intensity &amp; volume increase, building on-water rowing before erg unless rough water prevents this. Consider boat type when prescribing training: 8-10km x1 ≠ 8+.</p> <p>Rower can continue to use cross-training to 'top-up' training load. The planned &amp; completed training load should be monitored.</p> <p>Clinicians &amp; strength &amp; conditioning (S&amp;C) coaches should work together to formulate exercises individual to the rower that address rowing specific ROM, trunk strengthening &amp; movement deficits.</p> | <p>Return to full training should be planned with increasing on-water distance &amp; intensity as well as progressive increase in erg +/- S&amp;C &amp; cross-training. This should be individually tailored.</p> <p>As rower approaches return to full on-water training a reduction in cross-training occurs as part of overall load management.</p> <p>A strength &amp; mobility program that addresses modifiable risk factors for LBP should continue to ensure change is made &amp; may be prescribed for long term maintenance. Medical and coaching staff should work together to ensure the rehabilitation program translates into technical changes to protect from further injury.</p> <p>S&amp;C training should initially avoid high loads, progressive increases towards usual training can occur, monitoring response. Medical &amp; coaching staff should continue to work with the rower to achieve this.</p> |
| EDUCATION           | <p>Provide injury education, alleviate fears &amp; include the rower in initial planning.</p> <p>Manage coach &amp; the rower's expectations. Involve coach from outset &amp; allow them to contribute ideas about injury occurred.</p>                                                                                                                                                                                                                | <p>Involve the rower in planning &amp; educate about the multi-dimensional nature of LBP including contributors to onset &amp; persistence of pain.</p> <p>Support may come from coaching staff, medical staff, family &amp; friends or psychology.</p>                                                                                                                                                                                                                                                    | <p>The rower &amp; coach should have a thorough understanding of what symptoms can be tolerated when returning to training. A rower should have; no / low levels of pain during rowing, pain not getting increasingly worse when rowing &amp; no pain immediately after rowing.</p> <p>Continue to reassure &amp; educate the rower &amp; coach.</p>                                                                                                                                                                                                                                                                                                                                                                                                                                                                                                                                                                                                | <p>An athlete centred &amp; coach supported approach should be encouraged.</p> <p>Empower the rower to self-manage, have input into the plan &amp; follow the plan with the support of the medical staff &amp; coaching team around them.</p>                                                                                                                                                                                                                                                                                                                                                                                                                                                                                                                                                                                                                                                                                  |
