# Supplementary material for: 2021 consensus statement for preventing and managing low back pain in elite and subelite adult rowers
Source: HighWire-hosted journal article supplement (doi:10.1136/bjsports-2020-103385), 2021-03-08

Figure 2A: Acute episode of rowing-related low back pain: progression through phases from initial presentation to full return to sport

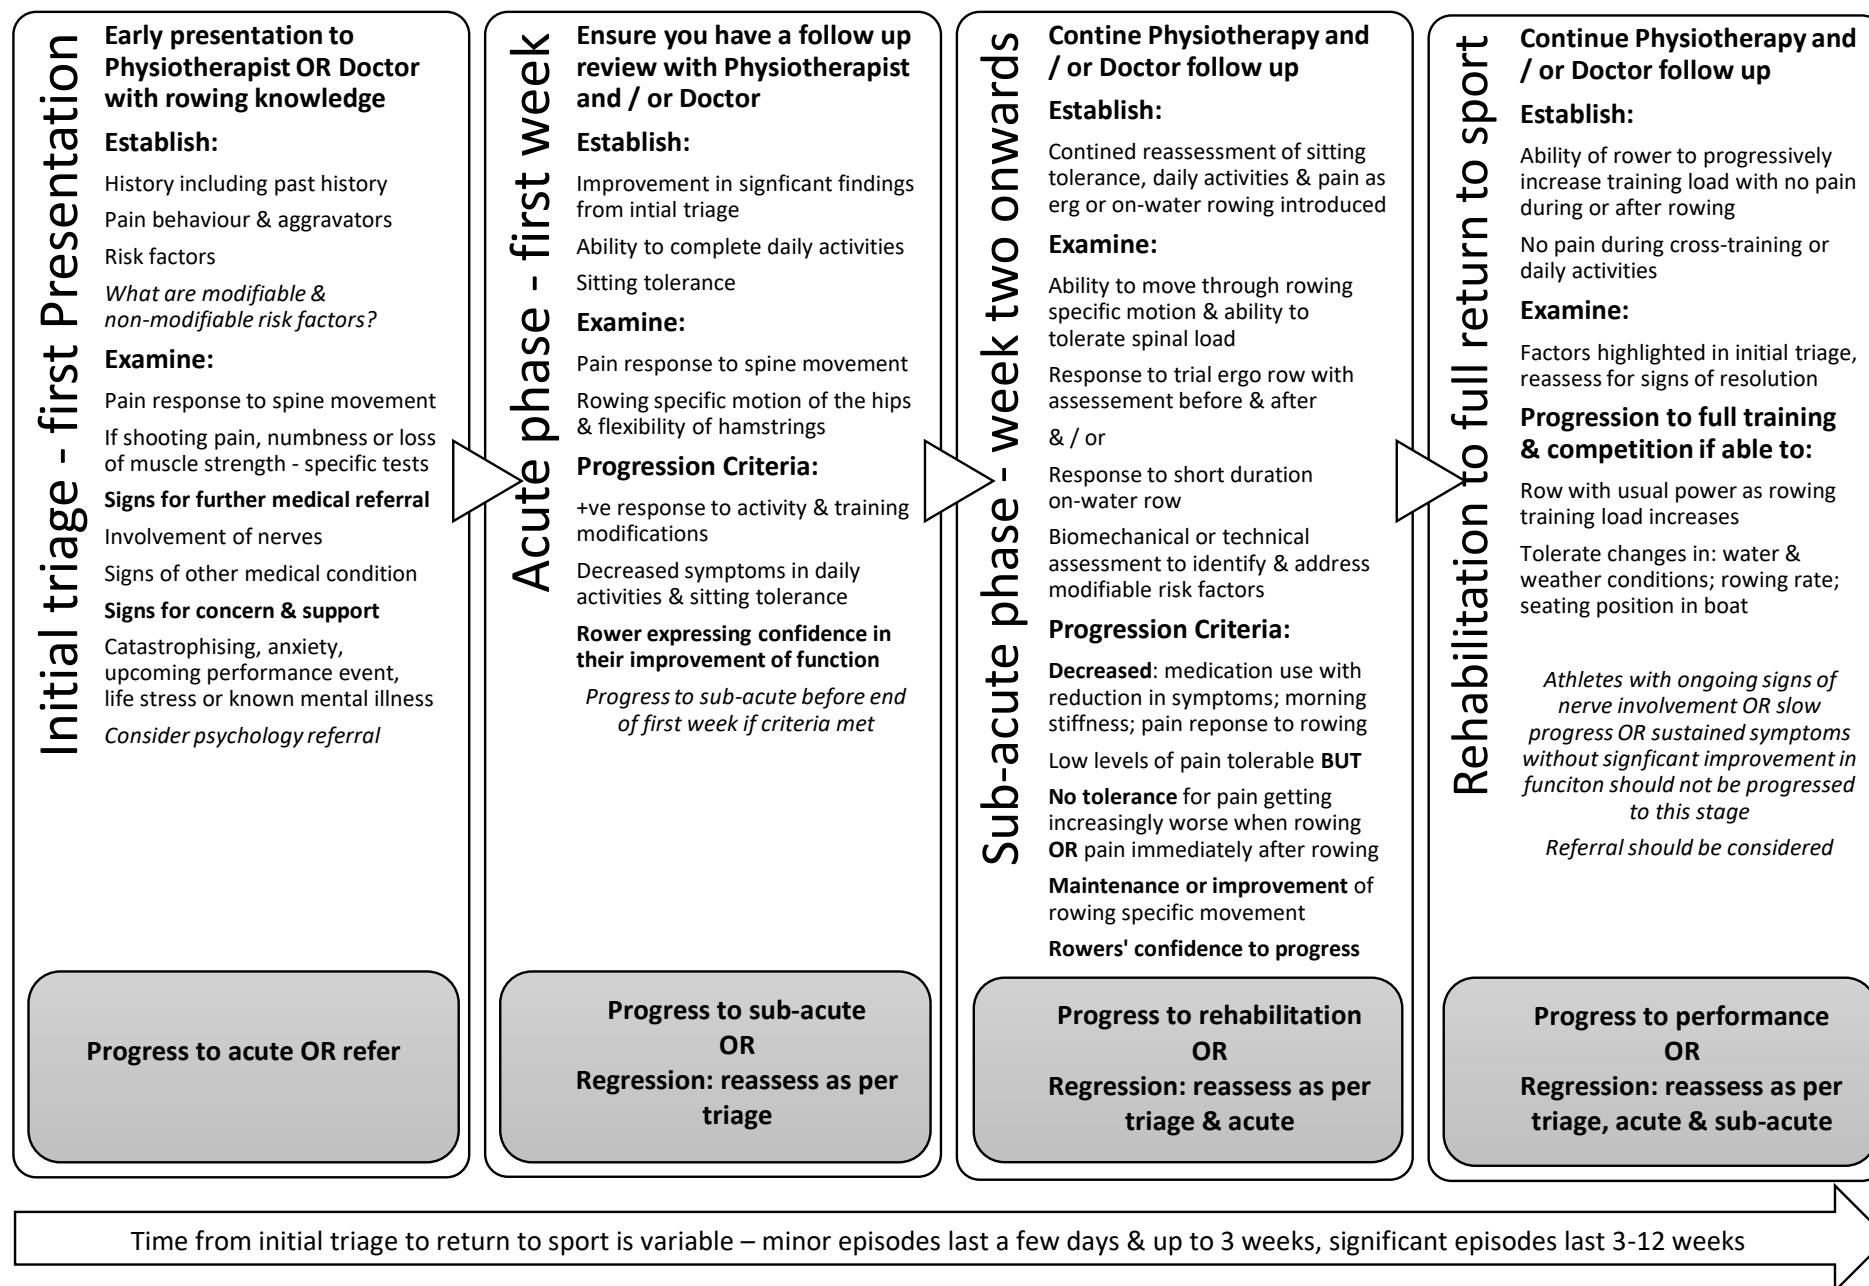

Supplement: bjsports-2020-103385supp005_data_supplement.pdf [file bjsports-2020-103385supp005_data_supplement.pdf]
